# Supplementary material for: The association between body mass index and all-cause mortality in Japanese patients with incident hemodialysis
Source: PLoS One. 2022 Jun 24;17(6):e0269849. doi: 10.1371/journal.pone.0269849 (PMC9231701; doi:10.1371/journal.pone.0269849)
Supplement: S1 Table — (XLSX) [file pone.0269849.s001.xlsx]

## Sheet: Sheet1
ID	sex	age	age65	late referral	AVF	temporary catheter	DM	CVD	smoke	RAASI	sBP	dBP	height	BWinitiation	BMIinitiation	first	BW2w	BMI2w	twoweeks	BMIdifference	BMdifferenceIfour	Cr	eGFR	Hb	Alb	Ca	Caadjust	P	K	edema	CTR	hypoxemia	overhydration	sBP2w	dBP2w	edema2w	CTR2w	hypoxemia2w	overhydration2w	Hb2w	Cr2w	K2w	Alb2w	Ca2w	Caadjust2w	P2w	death	period
1	M	75	Yes	No	Yes	No	No	No	Yes	Yes	178	79	157	63.6	25.8023	high	60.8	24.6663	high	1.13595	C	9.63	4.7	7.8	3	9.2	10.2	5.1	4.1	No	53.2	No	No	144	76	No	47.7	No	No	8.5	11.12	5.9	3.1	8.4	9.3	6.4	0	3218
2	M	77	Yes	No	Yes	No	No	No	Yes	Yes	155	69	158	53.9	21.5911	normal	53	21.2306	normal	0.360519	B	8.32	5.5	9.5	3.2	6.8	7.6	5.6	5.1	No	45.5	No	No	116	75	No	41.2	No	No	10.1	7.59	4.4	3.1	7.3	8.2	4.6	1	1585
3	M	54	No	No	Yes	No	Yes	Yes	Yes	No	163	80	168	65.2	23.1009	normal	59.5	21.0813	normal	2.01956	C	8.95	5.6	10.5	2.1	7.9	9.8	4.5	4.7	Yes	43	No	Yes	149	77	Yes	51.5	No	Yes	10.8	7.62	4.5	2.1	7.9	9.8	3.6	0	804
4	F	77	Yes	No	Yes	Yes	No	No	No	No	166	83	146	44.9	21.064	normal	42.4	19.8912	normal	1.17283	C	6.85	5	10	2.7	7.8	9.1	4.7	3.5	Yes	60.4	No	Yes	155	78	Yes	60.7	No	Yes	9.6	5.19	3.9	2.7	7.9	9.2	4.5	0	3199
5	M	71	Yes	No	Yes	No	Yes	No	Yes	Yes	213	98	156	62.4	25.641	high	59.7	24.5316	high	1.10947	C	9.56	4.8	8.5	2.7	8	9.3	5.9	4	Yes	51.5	No	Yes	133	67	No	48.2	No	No	9.1	8.45	3.5	2.8	7.6	8.8	4.8	0	3198
6	F	43	No	No	Yes	No	Yes	Yes	No	No	154	81	153	60.8	25.9729	high	57.2	24.435	high	1.53787	C	11.47	3.4	6.4	1.7	7.7	10	7.2	3.6	Yes	64.6	No	Yes	171	90	Yes	51.3	No	Yes	7.9	7.68	5.1	2.2	8	9.8	5.2	1	3008
7	F	75	Yes	No	Yes	No	Yes	No	No	No	180	80	157	50.5	20.4876	normal	49.5	20.082	normal	0.405696	B	6.8	5.1	8.9	3.9	8.4	8.5	6.3	3.9	No	64.2	No	No	139	68	No	60.4	No	No	9.2	7.16	3.9	3.7	8.5	8.8	6.1	1	2347
8	M	72	Yes	No	Yes	No	No	No	Yes	Yes	149	65	156	48.3	19.8471	normal	47.5	19.5184	normal	0.328731	A	8.77	5.3	10.3	3.8	6.9	7.1	6.5	5.6	Yes	47.6	No	Yes	136	68	No	47.6	No	No	10.7	6.81	4.2	3.6	7.3	7.7	5.3	1	1833
9	F	83	Yes	No	Yes	No	No	No	No	No	120	58	143	40.5	19.8054	normal	41	20.0499	normal	-0.244511	A	8.62	3.8	9.6	2.9	8.8	9.9	4.5	2.2	Yes	54.4	No	Yes	107	59	No	54.4	No	No	9.1	5.98	2.5	2.8	9.4	10.6	1.9	0	1105
10	F	53	No	No	Yes	No	No	No	No	Yes	184	100	144	38.5	18.5667	normal	36.6	17.6505	low	0.916281	B	9.25	4	9.4	3.5	7.7	8.2	6.4	4	Yes	47.5	No	Yes	130	85	No	49	No	No	10	6.45	3.3	3.7	8.8	9.1	4.9	0	3043
11	F	55	No	No	No	No	No	No	No	No	129	69	150	42.2	18.7556	normal	42.3	18.8	normal	-0.0444444	A	8.65	4.3	8.3	3.5	8.3	8.8	3.7	2.9	No	43.4	No	No	129	66	No	44	No	No	8.6	5.94	4	3.5	8.2	8.7	4.7	0	2880
12	M	61	No	No	Yes	No	No	No	Yes	Yes	163	81	163	54.3	20.4374	normal	51.7	19.4588	normal	0.978584	C	7.2	6.9	8.9	2.9	7.9	9	4	3.7	No	53.7	No	No	165	95	No	49.1	No	No	2.9	7.2	4	2.9	7.9	9	4	1	2241
13	M	54	No	No	Yes	No	Yes	No	No	Yes	153	85	160	60.5	23.6328	normal	54.1	21.1328	normal	2.5	D	10.49	4.7	8.5	2.7	5.4	6.7	4.8	4.4	Yes	54.8	No	Yes	161	95	No	50.9	No	No	10.9	10.58	4.1	3.2	7	7.8	5.7	0	3030
14	F	76	Yes	No	Yes	No	Yes	Yes	No	Yes	161	69	147	46	21.2874	normal	44.9	20.7784	normal	0.509047	B	7.49	4.6	7.5	2.7	8.6	9.9	4.9	2.6	No	46.8	No	No	193	75	No	47.4	No	No	7.5	6.24	3.3	2.9	8.5	9.6	3.5	1	2071
15	M	75	Yes	No	No	Yes	No	No	No	Yes	161	85	157	51.3	20.8122	normal	55.9	22.6784	normal	-1.8662	A	8.81	5.2	7.2	2.9	7.7	8.8	6.7	5.7	No	50.2	No	No	124	60	No	53.8	No	No	7.1	5.85	3	2.2	7.2	9	3.7	1	101
16	M	80	Yes	No	Yes	No	No	Yes	Yes	Yes	149	61	160	56.6	22.1094	normal	50.4	19.6875	normal	2.42188	D	6.96	6.6	9.8	3.2	7.3	8.1	4.8	4.2	Yes	63.7	No	Yes	210	81	Yes	60.6	No	Yes	8.9	4.24	3.4	3.2	7.5	8.3	3.3	0	2373
17	M	65	Yes	No	Yes	Yes	Yes	No	Yes	Yes	117	70	160	55.2	21.5625	normal	54.9	21.4453	normal	0.117188	A	8.82	5.4	10.6	2.8	8.5	9.7	5.6	4.1	Yes	44.8	No	Yes	142	65	No	41	No	No	10.1	7.74	4.4	3	8.2	9.2	6.1	0	129
18	F	67	Yes	No	Yes	No	Yes	No	Yes	No	172	79	150	70.3	31.2444	high	64.9	28.8444	high	2.4	D	9.78	3.5	7.8	1.9	7.4	9.5	6.4	4	Yes	58.6	No	Yes	132	60	Yes	58.6	No	Yes	8.8	7.53	3.7	2.1	7	8.9	4.6	0	1681
19	M	71	Yes	No	Yes	No	Yes	Yes	Yes	Yes	180	73	158.8	58.8	23.3172	normal	52.9	20.9775	normal	2.33965	D	7.73	6.1	9.8	2.7	7.3	8.6	5.3	4.5	Yes	53.3	No	Yes	113	62	No	57.8	No	No	8.6	6.84	4.3	2.8	7.8	9	2.8	1	2466
20	F	76	Yes	No	No	Yes	Yes	No	No	No	181	68	149	64.5	29.0527	high	61.4	27.6564	high	1.39633	C	6.55	5.3	7.7	2.4	8.1	9.7	6.1	5	Yes	60.8	No	Yes	174	71	Yes	56.7	No	Yes	8.2	6.02	4.1	2.4	7.4	9	5	0	2929
21	F	78	Yes	No	Yes	No	No	No	No	Yes	168	72	136	39.7	21.4641	normal	38.2	20.6531	normal	0.810986	B	8.59	3.9	11.1	3.8	10.4	10.6	5.2	3.7	Yes	62.1	No	Yes	148	75	Yes	62.1	No	Yes	10.2	6.51	3.7	3.4	6.9	7.5	6.4	1	1341
22	F	64	No	Yes	Yes	No	No	No	Yes	No	94	51	147	46.9	21.7039	normal	46.5	21.5188	normal	0.185108	A	11.53	3	7.6	2.9	5.8	6.9	9.1	4.6	No	46.1	No	No	97	54	No	46.1	No	No	8	6.61	2.8	2.9	5.8	6.9	4.5	0	2739
23	M	54	No	Yes	Yes	No	Yes	Yes	Yes	No	156	89	171	77.5	26.5039	high	77.3	26.4355	high	0.0683971	A	8.98	5.6	11.8	4	7.4	7.4	6.8	3.7	No	48.5	No	No	141	81	No	51	No	No	11.1	7.5	3.9	4	8	8	3.9	1	2021
24	M	70	Yes	Yes	Yes	Yes	No	No	Yes	No	120	69	155	50.6	21.0614	normal	50.4	20.9781	normal	0.0832466	A	5.57	8.8	7.9	3.1	8.1	9	4.7	5.4	No	55.8	Yes	Yes	165	80	No	53.8	No	No	14.1	7.38	4.2	2.6	8.1	9.5	4.3	1	2368
25	M	77	Yes	No	Yes	No	No	No	No	Yes	177	85	163	65.9	24.8033	high	57.4	21.6041	normal	3.19922	D	10.76	4.1	7.3	3.3	8	8.7	5	5	Yes	58.9	No	Yes	149	71	No	45.4	No	No	8.3	9.37	4.3	3.8	8.3	8.5	6.1	1	1171
26	M	81	Yes	Yes	Yes	Yes	No	No	Yes	No	164	80	150	51.7	22.9778	normal	46.9	20.8444	normal	2.13333	D	5.4	8.7	7.9	3	8.2	9.2	4.5	3.7	No	61.1	Yes	Yes	114	72	No	59.6	No	No	8.8	3.62	2.9	2.8	7.6	8.8	4.2	1	811
27	F	55	No	No	Yes	No	No	No	No	No	146	86	153	43.8	18.7108	normal	41.6	17.7709	low	0.939809	B	15.46	2.3	8.6	3.3	7	7.7	7.4	4.8	Yes	47.9	No	Yes	145	91	No	47.8	No	No	8.9	11.33	4.6	3.3	7.8	8.5	5.9	0	894
28	F	74	Yes	Yes	No	Yes	No	No	No	Yes	143	82	153	40	17.0874	low	38.4	16.4039	low	0.683498	B	2.97	12.7	9.2	2.7	8.4	9.7	5.1	4.3	Yes	55.5	Yes	Yes	113	60	No	49.1	No	No	7.8	3.06	3.7	2.9	8.4	9.5	5.1	1	223
29	M	77	Yes	No	Yes	No	Yes	No	Yes	Yes	175	67	163	55.5	20.889	normal	53.9	20.2868	normal	0.602206	B	10.17	4.4	9.1	1.9	8.1	10.2	4.9	3.8	Yes	53.7	No	Yes	162	67	No	45.9	No	No	11.7	8.16	4.3	2.6	8.3	9.7	4.2	0	2951
30	M	68	Yes	Yes	Yes	No	Yes	Yes	Yes	No	113	70	158	64.8	25.9574	high	59.4	23.7943	normal	2.16311	D	9.26	5.1	7.3	2.9	6.2	7.3	6.3	3.4	Yes	59.6	No	Yes	128	69	Yes	64.4	No	Yes	8	3.25	3.5	2.7	6.9	8.2	2	1	1802
31	M	66	Yes	No	Yes	No	Yes	No	No	Yes	217	117	159	79.3	31.3674	high	70.9	28.0448	high	3.32265	D	8	6	11.5	3.2	7.2	8	5.3	5.3	Yes	63.1	No	Yes	130	65	No	54.5	No	No	10	8.03	4.2	2.9	7.7	8.8	5	0	456
32	F	85	Yes	Yes	No	Yes	Yes	Yes	Yes	Yes	95	50	154	47.3	19.9443	normal	46.5	19.607	normal	0.337325	A	4.24	8.2	8.1	3	8.5	9.5	5.1	4.9	No	60.4	No	No	89	42	No	56.3	No	No	11.3	3.98	3.5	3	8.4	9.4	5.1	0	90
33	M	71	Yes	No	Yes	No	Yes	No	Yes	Yes	178	88	165	71.4	26.2259	high	69	25.3444	high	0.881543	B	8.61	5.4	10.3	3.9	8	8.1	7.3	5.7	No	60.3	No	No	162	81	No	60.3	No	No	10.2	7.44	4.1	3.7	8.3	8.6	5.3	1	1302
34	M	81	Yes	No	Yes	Yes	Yes	No	Yes	Yes	150	74	159	70.8	28.0052	high	65.5	25.9088	high	2.09644	D	9.36	4.8	8.6	2.8	7.2	8.4	6.5	3.2	Yes	67.2	Yes	Yes	126	47	No	46.3	No	No	8.9	4.01	4.9	2.8	8.1	9.3	4.5	0	914
35	F	86	Yes	No	No	No	No	No	No	Yes	115	48	131	30.9	18.0059	low	29.4	17.1319	low	0.874075	B	4.37	8	8.2	3.2	8.2	9	6.7	2.8	Yes	68.2	No	Yes	124	64	No	63.5	No	No	9.7	4.25	3.2	3.7	8.3	8.6	5.6	1	1612
36	F	79	Yes	Yes	Yes	Yes	No	No	No	No	107	58	142	35.6	17.6552	low	35.3	17.5064	low	0.14878	A	5.44	6.4	9.6	3.2	8.5	9.3	4.3	3.5	No	59.2	No	No	139	63	No	58.6	No	No	7.6	5.5	2.9	2.8	8	9.2	3.8	0	170
37	F	84	Yes	No	Yes	No	No	No	No	Yes	135	68	142	46.9	23.2593	normal	43.7	21.6723	normal	1.58699	C	6.04	5.6	8.9	2.9	7.1	8.2	6.6	3.6	Yes	63.1	No	Yes	104	58	No	59.7	No	No	9.9	5.87	3.7	3	7.7	8.7	5.9	0	1973
38	M	81	Yes	No	Yes	No	No	No	Yes	Yes	135	81	158	41.4	16.5839	low	40.8	16.3435	low	0.240346	A	7.16	6.4	12.1	3.4	7.8	8.4	5.8	5.2	No	56	No	No	119	72	No	56	No	No	10.7	6.36	3.4	3.3	7.8	8.5	4	0	621
39	M	63	No	No	Yes	No	Yes	Yes	Yes	Yes	173	93	172	79.7	26.9402	high	67.9	22.9516	normal	3.98864	D	8.26	5.9	10.5	2.4	7.8	9.4	9	4.2	Yes	48.4	No	Yes	148	78	No	45.4	No	No	11.7	7.71	3.6	2.2	7.8	9.6	5.1	1	866
40	M	66	Yes	No	Yes	No	No	No	Yes	Yes	119	61	155	48.8	20.3122	normal	48.3	20.1041	normal	0.208117	A	8.75	5.4	6.5	2.6	8.4	9.8	5	4.4	No	46.6	No	No	125	68	No	46.6	No	No	7	6.1	3.9	2.6	8.3	9.7	4.3	0	2852
41	F	83	Yes	Yes	No	Yes	Yes	Yes	No	No	110	65	150	48.5	21.5556	normal	46.1	20.4889	normal	1.06667	C	6.53	5.2	7	1.9	7.7	9.8	6.6	5.9	No	60	Yes	Yes	132	63	No	60.1	No	No	8.3	4.28	3.9	1.9	7.5	9.6	3.1	0	1866
42	M	82	Yes	Yes	Yes	No	No	No	Yes	No	198	85	165	44.9	16.4922	low	43.2	15.8678	low	0.624426	B	9.52	4.7	9.5	3.6	8.2	8.6	5.6	4.1	No	47.7	No	No	180	89	No	47.7	No	No	8.6	7.99	3.8	3.4	7.8	8.4	4.8	0	2119
43	M	72	Yes	No	Yes	No	No	No	Yes	Yes	163	85	167	53.7	19.2549	normal	52.5	18.8246	normal	0.430277	B	12.16	3.7	7.8	4	8.6	8.6	8.1	5.1	No	52.6	No	No	151	85	No	50.2	No	No	8.6	9.86	4.1	3.7	9.9	10.2	7.2	0	1626
44	M	58	No	No	Yes	No	Yes	No	Yes	Yes	181	102	168	56.6	20.0539	normal	55.2	19.5578	normal	0.496032	B	18.62	2.5	9.9	4	9.1	9.1	11.5	7.3	No	58.2	No	No	186	98	No	54.6	No	No	7.5	6.87	4.8	3.4	8.3	8.9	5.3	0	2802
45	F	78	Yes	Yes	Yes	Yes	No	No	No	Yes	183	79	144	37.8	18.2292	low	37.9	18.2774	low	-0.0482253	A	13.42	2.4	6.6	3.9	10.4	10.5	8.2	6.3	No	46.6	No	No	132	70	No	53.2	No	No	8.2	7.07	3.9	2.7	8	9.3	4.1	1	2738
46	M	86	Yes	No	No	Yes	Yes	No	Yes	Yes	201	87	158	44.5	17.8257	low	44.5	17.8257	low	0	A	11.13	3.9	10.5	2.3	7	8.7	6.8	4.9	No	55.2	No	No	201	83	No	57.2	Yes	Yes	8.9	6.18	3.9	2	7.4	9.4	4.4	1	231
47	F	79	Yes	No	No	No	No	Yes	No	Yes	148	83	140	41.8	21.3265	normal	41.2	21.0204	normal	0.306122	A	9.02	3.7	10.4	3.1	8	8.9	4.9	3.8	No	54.2	No	No	139	71	No	57.7	No	No	7.9	6.48	3.5	2.7	7.5	8.8	3.3	0	1101
48	M	80	Yes	No	Yes	No	No	No	No	No	212	95	140	55.8	28.4694	high	54.4	27.7551	high	0.714286	B	9.19	4.9	10.2	4	7.9	7.9	5.4	6.2	Yes	62.7	No	Yes	166	85	No	61.5	No	No	10.4	7.76	4.6	3.5	8.6	9.1	5.4	0	2807
49	M	69	Yes	Yes	Yes	No	No	No	Yes	No	175	75	152	60.4	26.1427	high	56.9	24.6278	high	1.51489	C	8.87	5.3	8.1	1.9	7.6	9.7	5.7	3.6	Yes	53.7	No	Yes	186	70	Yes	53.7	No	Yes	8.1	8.87	3.6	1.9	7.6	9.7	5.7	0	2073
50	F	65	Yes	No	Yes	Yes	No	No	No	Yes	131	78	158	54.5	21.8314	normal	51.4	20.5896	normal	1.24179	C	9.24	3.8	9.2	3.5	7.9	8.4	7.1	5.7	Yes	48.4	No	Yes	105	71	No	48.4	No	No	9.3	7.03	3.8	3.3	8.7	9.4	3.7	0	2797
51	M	47	No	No	Yes	Yes	Yes	No	No	No	168	89	172	93.2	31.5035	high	80.2	27.1092	high	4.39427	D	9.23	5.5	9.6	2.1	7.1	9	6.5	4	Yes	50.3	No	Yes	174	94	No	48.9	No	No	8.6	7.15	3.9	1.8	7.6	9.8	3.8	0	2793
52	M	46	No	Yes	No	Yes	Yes	No	Yes	Yes	124	61	169	88	30.8112	high	62.4	21.848	normal	8.96327	D	4.48	12.5	6.2	1.1	7.1	10	4.3	4.6	Yes	57.2	Yes	Yes	146	75	No	50.3	No	No	7.9	4.61	3.7	1.8	7.7	9.9	6.8	0	2377
53	M	83	Yes	No	Yes	No	Yes	No	Yes	No	162	52	151	53	23.2446	normal	52.8	23.1569	normal	0.0877155	A	8.55	5.2	10.6	2.8	7.5	8.7	5.7	4.2	No	47.6	No	No	152	67	No	48.6	No	No	11	6.9	4.7	2.9	7.8	8.9	4.2	1	1683
54	M	53	No	No	Yes	No	No	Yes	No	No	90	72	164	72.9	27.1044	high	66.5	24.7249	high	2.37954	D	11.02	4.5	9.3	4.1	8.4	8.4	6.8	4.9	Yes	51.9	No	Yes	136	89	Yes	47.1	No	Yes	9.7	10.97	4.2	4	8.9	8.9	4.6	0	2750
55	M	43	No	No	Yes	No	Yes	No	Yes	Yes	180	111	176	89.8	28.9902	high	87.8	28.3445	high	0.645661	B	9.77	5.4	9.7	4	7.8	7.8	5.1	4.4	No	46	No	No	180	97	No	47.4	No	No	10.9	8.27	4.4	4	9.4	9.4	5	0	2749
56	M	73	Yes	Yes	Yes	Yes	No	No	Yes	No	134	77	165	60.8	22.3324	normal	54.4	19.9816	normal	2.35078	D	6.64	7.1	7.6	2.1	7.2	9.1	7.6	5	Yes	57.8	No	Yes	143	84	Yes	60.2	No	Yes	7.8	3.11	3.3	2	7	9	2.8	0	128
57	M	31	No	No	Yes	No	No	No	Yes	Yes	144	79	171	84.8	29.0004	high	85.6	29.274	high	-0.273588	A	9.03	6.5	10.3	3.4	8.9	9.5	6.6	3.9	No	52.5	No	No	192	111	No	57.8	No	No	10	4.92	3.3	3.4	8.5	9.1	3.7	0	2706
58	M	74	Yes	No	Yes	Yes	Yes	No	Yes	Yes	166	71	166	51.7	18.7618	normal	50	18.1449	low	0.616926	B	9.67	4.7	9.9	2.4	7.9	9.5	10.5	8.8	No	44.3	No	No	137	81	No	45.2	No	No	8.4	6.98	2.8	1.8	7.5	9.7	3.4	1	1325
59	F	78	Yes	No	Yes	No	Yes	No	No	Yes	157	81	140	50.9	25.9694	high	45.6	23.2653	normal	2.70408	D	6.34	5.4	7.7	2.8	7.2	8.4	5.2	3.5	Yes	62.9	No	Yes	115	61	No	59.5	No	No	7.3	6.77	3.6	2.6	7.5	8.9	5.5	1	433
60	F	63	No	No	Yes	No	Yes	No	No	Yes	180	89	145	49	23.3056	normal	47.6	22.6397	normal	0.665874	B	7.53	4.8	10.7	3.2	8.7	9.5	6.8	4.6	Yes	43.5	No	Yes	162	83	No	42.1	No	No	11.2	6.62	4.2	3.2	7.7	8.5	5.1	0	2591
61	M	62	No	No	Yes	No	Yes	Yes	No	Yes	161	77	161	73.1	28.2011	high	69.3	26.7351	high	1.46599	C	7.57	6.5	10.7	3.8	8.8	9	8.3	5	Yes	50.6	No	Yes	152	70	No	50.6	No	No	10.7	7.57	5	3.8	8.8	9	8.3	0	1545
62	F	82	Yes	No	Yes	No	No	Yes	Yes	Yes	99	44	137	44.8	23.8691	normal	45.4	24.1888	high	-0.319676	A	6.16	5.5	14.2	3.8	8.8	9	8.3	5.3	No	62.2	No	No	161	75	No	69.1	No	No	10	3.18	3.7	3.1	8.6	9.5	2.9	0	1579
63	F	79	Yes	No	Yes	Yes	No	No	No	Yes	95	53	148	43.9	20.042	normal	38.1	17.3941	low	2.64792	D	10.56	3.1	10.1	2.2	7.5	9.3	7.4	3.9	No	62	Yes	Yes	154	86	No	59.7	Yes	Yes	9.4	5.1	5.1	2.6	7.3	8.7	5.5	1	563
64	M	72	Yes	No	Yes	No	Yes	No	Yes	Yes	160	76	165	68.2	25.0505	high	56.5	20.753	normal	4.29752	D	8.57	5.4	10.6	2.9	6.3	7.4	8.9	4.2	Yes	56.1	No	Yes	155	71	No	55	No	No	9.8	7.53	3.6	2.5	8	9.5	5.3	0	846
65	M	64	No	No	Yes	No	No	No	Yes	Yes	170	90	168	56.3	19.9476	normal	54.9	19.4515	normal	0.496032	B	10.01	4.7	8.3	3.7	9.1	9.4	6.3	5.1	No	46.2	No	No	155	87	No	46.2	No	No	8.6	8.78	4.1	3.6	8.8	9.2	3.9	0	1010
66	M	79	Yes	No	Yes	No	No	Yes	Yes	Yes	135	69	162	51	19.433	normal	46.2	17.604	low	1.82899	C	6.34	7.3	9.1	2.4	8.2	9.8	3.4	3.5	No	56.4	Yes	Yes	132	76	No	57.4	No	No	9.4	4.66	4	2.4	8.2	9.8	2.2	0	1161
67	F	80	Yes	No	Yes	No	No	No	No	No	147	67	142	33.6	16.6634	low	33	16.3658	low	0.29756	A	6.17	5.6	7.8	3	8.3	9.3	6.3	4	No	67.9	Yes	Yes	126	59	No	54.4	No	No	7.6	5.16	3.9	2.9	7.7	8.8	5	0	1091
68	F	73	Yes	No	Yes	No	Yes	Yes	Yes	Yes	143	71	150	43.1	19.1556	normal	41	18.2222	low	0.933333	B	6.97	5	8.3	2.9	8.3	9.4	4.1	3.7	Yes	60.8	No	Yes	110	56	No	60.5	No	No	8.2	5.69	3.4	2.7	8.4	9.7	3.3	0	1694
69	M	89	Yes	No	Yes	No	No	Yes	Yes	No	114	61	153	43.4	18.5399	normal	43.5	18.5826	normal	-0.0427186	A	6.82	6.5	11	3.6	9.3	9.7	6.3	3.2	No	54	No	No	107	52	No	50.2	No	No	11.4	5.96	3.6	3.1	8.7	9.6	4.1	1	343
70	M	68	Yes	Yes	Yes	No	Yes	No	Yes	No	193	90	155	44.7	18.6056	normal	42.4	17.6483	low	0.957336	C	10.32	4.5	7.7	2.8	6.4	7.6	4.6	3.9	No	46.3	No	No	160	85	No	49.9	No	No	8.1	6.92	4.4	3	7.4	8.4	4.1	1	1446
71	F	73	Yes	No	Yes	No	No	No	No	No	135	74	136	49.7	26.8707	high	46	24.8702	high	2.00043	C	10.06	3.3	9.7	2.9	4.9	6	7.6	3.5	Yes	77.7	No	Yes	146	91	No	77.9	No	No	10.1	6.74	3.6	3.4	7.1	7.7	4.6	1	2468
72	F	63	No	No	Yes	No	Yes	No	No	Yes	165	92	144	39.9	19.2419	normal	37.9	18.2774	low	0.964506	C	10.08	3.5	10.9	3.5	8.5	9	5.2	5	Yes	53.4	No	Yes	148	84	No	49.1	No	No	10.8	8.49	4.2	3.8	8.7	8.9	4.7	1	2467
73	F	65	Yes	No	Yes	No	Yes	No	No	No	141	72	147	64.8	29.9875	high	59.3	27.4423	high	2.54524	D	9.34	3.8	10.4	3	8	9	8.1	4.5	Yes	63.6	No	Yes	161	83	No	59.5	No	No	9.9	7.3	4.4	2.8	8.1	9.3	5.4	0	2513
74	M	82	Yes	No	Yes	No	No	No	Yes	No	169	72	160	48.9	19.1016	normal	45.8	17.8906	low	1.21094	C	8.04	5.6	10.3	2.8	7.3	8.5	5.6	4.8	No	54.2	No	No	167	77	No	47.8	No	No	10.1	6.95	3.8	3.1	8	8.9	5.4	1	892
75	F	68	Yes	No	Yes	Yes	Yes	No	Yes	Yes	157	77	139	62.8	32.5035	high	59.5	30.7955	high	1.70799	C	12.44	2.7	8.8	2.4	8.8	10.4	6.2	4.3	No	54.6	No	No	145	78	Yes	55.2	No	Yes	8.1	4.68	3.1	2.2	8	9.8	1.3	0	2488
76	M	78	Yes	No	Yes	No	Yes	No	No	No	165	82	148	44.9	20.4985	normal	42.9	19.5855	normal	0.913075	B	8.27	5.5	9.1	3.7	8.8	9.1	5.5	3.9	No	54.4	No	No	149	71	No	50.2	No	No	10.6	7.02	3.8	3.6	8.3	8.7	4.9	0	814
77	M	51	No	Yes	Yes	Yes	No	No	Yes	No	189	113	174	73.4	24.2436	high	68.9	22.7573	normal	1.48633	C	21.66	2.2	4.8	2.5	7.2	8.7	8.8	5	Yes	53.6	No	Yes	159	102	No	56.2	No	No	8.6	8.6	4.2	2.5	8.5	10	4.4	0	2483
78	M	83	Yes	No	Yes	No	No	Yes	Yes	Yes	168	90	153	43.9	18.7535	normal	41.6	17.7709	low	0.982528	C	12.57	3.4	9.4	3.7	8.9	9.2	6	5.1	Yes	54.9	No	Yes	143	68	No	54.1	No	No	7.4	6.88	4.6	3	8.2	9.2	4.3	1	1768
79	F	79	Yes	No	No	Yes	Yes	No	No	Yes	110	51	148	53.5	24.4248	high	47.5	21.6855	normal	2.73923	D	9.21	3.6	8.6	3.2	6.5	7.3	5.3	5.4	Yes	66.9	Yes	Yes	161	61	No	53.7	No	No	9.1	6.69	4.4	3.4	9.5	10.1	2.7	1	464
80	F	83	Yes	No	Yes	No	No	No	No	Yes	191	96	140	39.4	20.102	normal	34.9	17.8061	low	2.29592	D	6.63	5.1	11.1	3.3	8.2	8.9	5.1	4.6	Yes	62.1	Yes	Yes	156	76	No	55.6	No	No	9.3	5.87	4.4	3.4	8.1	8.7	5.1	0	2380
81	F	87	Yes	No	No	Yes	No	No	No	No	166	53	135	49	26.8861	high	44.4	24.3621	high	2.52401	D	6.24	5.4	9.4	2.3	8.1	9.8	6	3.2	Yes	64.2	No	Yes	156	59	No	64.2	No	No	8.6	6.98	2.8	2.7	8.5	9.8	3.9	1	2167
82	M	53	No	No	Yes	No	Yes	No	Yes	Yes	183	103	167	66.3	23.7728	normal	59.4	21.2987	normal	2.47409	D	10.62	4.7	8.5	2.5	6.8	8.3	7.7	5.6	Yes	55.9	No	Yes	153	87	No	47.9	No	No	9.1	7.98	4	2.4	7.4	9	5	0	965
83	F	68	Yes	Yes	No	Yes	Yes	Yes	Yes	Yes	140	63	158	72.2	28.9216	high	69.7	27.9202	high	1.00144	C	6.19	5.8	7.2	3.4	8.1	8.7	4.9	4.6	No	69.1	Yes	Yes	187	88	No	56.7	No	No	8.3	6.78	3.5	2.3	7.7	9.4	4.7	0	2185
84	M	57	No	No	Yes	No	Yes	Yes	Yes	No	239	112	163	64.3	24.2011	high	59.9	22.5451	normal	1.65607	C	9.59	5.1	9.2	2.8	7.9	9.1	5.4	4.8	Yes	45.4	No	Yes	182	103	No	42.2	No	No	10.3	10.49	4.1	3.4	8.3	8.9	5.3	0	2413
85	M	69	Yes	No	Yes	No	Yes	No	Yes	No	173	76	152	49.9	21.598	normal	48.4	20.9488	normal	0.649238	B	9.85	4.7	10.5	3.9	5.4	5.5	7.2	4.5	No	47.1	No	No	182	83	No	45.4	No	No	9.9	8.71	4.5	3.8	7.2	7.4	6.3	0	2385
86	M	82	Yes	No	Yes	No	Yes	No	Yes	Yes	109	50	152	48.4	20.9488	normal	46.9	20.2995	normal	0.649238	B	10.26	4.3	9.4	3.5	6.1	6.6	7.1	3.8	No	52.2	No	No	125	61	No	51	No	No	8.4	5.58	3.6	3	7.1	8.1	3.7	1	280
87	F	78	Yes	No	Yes	No	Yes	No	No	Yes	165	78	147	46.2	21.38	normal	44.6	20.6395	normal	0.740432	B	7.43	4.6	8.7	2.9	8.1	9.2	4.9	4.1	No	63.6	No	No	136	87	No	59.4	No	No	8.8	5.62	4.4	2.9	7.7	8.8	5.4	0	2171
88	F	64	No	No	Yes	No	No	No	No	No	161	89	154	45.1	19.0167	normal	43.4	18.2999	low	0.716816	B	9.75	3.6	8.6	3.6	7.5	7.9	7.2	5.2	Yes	47.2	No	Yes	139	75	No	47.3	No	No	8.6	6.85	4.1	3.6	8.6	9	5.9	0	1030
89	M	71	Yes	No	Yes	Yes	Yes	Yes	Yes	Yes	138	74	155	56.8	23.642	normal	48.5	20.1873	normal	3.45473	D	7.78	6.1	9.1	2	6.1	8.1	6.3	3.6	Yes	51.1	No	Yes	122	63	Yes	55.9	No	Yes	8.7	5.58	3.8	1.8	7.5	9.7	2.9	1	2017
90	M	81	Yes	No	Yes	Yes	Yes	Yes	Yes	No	112	50	150	45.1	20.0444	normal	43.4	19.2889	normal	0.755556	B	11.11	3.9	8.6	2	6.1	8.1	6.9	3.4	Yes	55.6	No	Yes	127	65	No	55.1	No	No	8.2	7.72	3.6	2	7.1	9.1	4.2	1	616
91	M	47	No	No	Yes	No	Yes	No	Yes	Yes	153	85	175	85.5	27.9184	high	73	23.8367	normal	4.08163	D	11.77	4.3	8.1	2.9	6.7	7.8	8.7	5.3	Yes	56.8	No	Yes	139	80	No	55.1	No	No	7.6	8.98	5	2.7	7.2	8.5	5.9	0	2372
92	M	80	Yes	No	Yes	No	No	No	Yes	Yes	187	97	162	57.9	22.0622	normal	54.4	20.7285	normal	1.33364	C	12.17	3.6	10.3	3.3	8.5	9.2	5.5	3	Yes	60.7	No	Yes	174	94	No	58.6	No	No	10.2	9.34	3.2	3.3	8.2	8.9	5.2	0	2371
93	F	88	Yes	No	No	No	No	No	No	Yes	149	51	138	38.9	20.4264	normal	35.1	18.431	low	1.99538	C	9.19	3.5	8.9	2.6	7.9	9.3	4.7	3.9	Yes	72.6	No	Yes	143	59	No	65.7	No	No	8.8	4.93	2.2	2.2	7.9	9.7	4.7	1	673
94	F	78	Yes	Yes	Yes	Yes	No	No	No	No	157	83	137	35.5	18.9142	normal	35	18.6478	normal	0.266397	A	5.27	6.7	10.9	2.1	5	6.9	6.3	5.8	No	59.6	No	No	140	74	No	55.7	No	No	7.8	3.85	4	2	6.9	8.9	4.5	1	1905
95	M	81	Yes	No	Yes	No	No	Yes	Yes	No	120	72	149	51.9	23.3773	normal	49.5	22.2963	normal	1.08103	C	9.65	4.6	8.9	3.2	7.6	8.4	4.4	3.8	No	54	No	No	178	93	No	50.7	No	No	9	8.03	4.3	3	7.8	8.8	3.3	0	2193
96	M	81	Yes	No	Yes	Yes	No	Yes	No	No	121	70	160	61.1	23.8672	normal	49.3	19.2578	normal	4.60938	D	6.31	7.3	5.6	2.7	7.9	9.2	5.3	6.2	Yes	57.7	Yes	Yes	171	85	No	51.6	No	No	9.1	5.5	4.6	2.9	7.9	9	4.2	0	1142
97	M	78	Yes	No	Yes	No	No	No	No	No	174	91	170	60.9	21.0727	normal	59.3	20.519	normal	0.553633	B	8.71	5.2	9.5	3.7	8.3	8.6	4.8	4.1	No	49.2	No	No	139	75	No	45.2	No	No	9.5	7.88	4.5	3.5	7.9	8.4	4.5	0	1950
98	M	77	Yes	No	Yes	No	Yes	No	Yes	No	154	73	170	60.9	21.0727	normal	60.9	21.0727	normal	0	A	12.47	3.5	10.2	3.7	8.2	8.5	6	5.8	No	49	No	No	151	77	No	46	No	No	9.4	8.8	3.8	3.2	8	8.8	4.6	1	1765
99	M	78	Yes	No	Yes	No	No	No	Yes	Yes	184	82	165	71.4	26.2259	high	69.9	25.6749	high	0.550964	B	7.66	6	9.6	2.9	7.8	8.9	4	4.8	No	47.4	No	No	163	78	No	46.7	No	No	9.5	7.71	4.9	2.9	7.5	8.6	4.6	0	2035
100	M	72	Yes	No	Yes	Yes	No	No	No	No	125	71	163	59.8	22.5074	normal	56.3	21.1901	normal	1.31732	C	12	3.8	10.2	2.4	8	9.6	10.8	4.4	No	49.4	No	No	90	47	No	49.4	No	No	9.2	6.64	3.2	1.8	7.4	9.6	4	1	1480
101	F	85	Yes	No	Yes	Yes	Yes	No	No	Yes	128	54	147	48.7	22.5369	normal	41.4	19.1587	normal	3.37822	D	7.17	4.6	9.9	2.6	6	7.4	7.1	3.7	Yes	62.1	Yes	Yes	197	83	No	55.6	No	No	8.8	5.77	2.7	2.6	6.8	8.2	5.9	0	2152
102	M	65	Yes	No	Yes	No	Yes	Yes	Yes	Yes	184	81	166	58.2	21.1206	normal	57.3	20.794	normal	0.326608	A	8.11	5.9	9.9	3.1	6.5	7.4	5.1	3.9	No	50.4	No	No	165	88	No	47.3	No	No	9.9	7.66	4	2.9	8	9.1	1.9	1	1861
103	M	72	Yes	No	Yes	No	Yes	No	No	No	198	84	161	53.9	20.794	normal	52.9	20.4082	normal	0.385788	B	9.23	5	10.5	3.7	10	10.3	4.8	4.3	No	50.2	No	No	180	72	No	53.5	No	No	9.9	6.79	3.8	3.1	7.8	8.7	4.3	1	1481
104	M	64	No	No	Yes	No	No	No	Yes	Yes	171	101	162	54.4	20.7285	normal	52.9	20.157	normal	0.571559	B	9.44	5	9.8	3.6	9	9.4	3.9	4.7	No	55.1	No	No	114	74	No	55.1	No	No	9.8	9.44	4.7	3.6	9	9.4	3.9	0	1968
105	F	78	Yes	No	Yes	No	No	No	No	Yes	142	73	142	37.3	18.4983	normal	35	17.3577	low	1.14065	C	9.1	3.7	11.3	3.3	8	8.7	4.7	4.8	Yes	53.2	No	Yes	136	72	No	49.1	No	No	11.8	7.14	4.4	3.2	8.3	9.1	3.2	0	1338
106	F	70	Yes	No	Yes	No	Yes	Yes	No	Yes	109	51	145	42.3	20.1189	normal	41.3	19.6433	normal	0.475624	B	7.17	4.9	8.3	3.7	8.3	8.6	5.3	5.5	Yes	57.1	Yes	Yes	154	64	No	56.3	No	No	9.3	6.35	4.1	4.2	9	9	5.2	0	1202
107	F	61	No	No	Yes	No	Yes	No	No	Yes	168	86	150	63.6	28.2667	high	60.6	26.9333	high	1.33333	C	12.96	2.7	9	3.8	6.7	6.9	7	5.3	No	60	No	No	124	62	No	56.5	No	No	10.6	8.61	4.8	3.7	9	9.3	1.4	0	2274
108	M	72	Yes	No	Yes	No	Yes	Yes	No	Yes	150	82	164	57.4	21.3415	normal	53	19.7055	normal	1.63593	C	9.34	4.9	9.6	3.5	8.2	8.7	4.3	4.1	Yes	43	No	Yes	120	78	No	40.7	No	No	10.1	7.66	4	3.8	8.7	8.9	3.9	0	2198
109	F	68	Yes	No	Yes	No	Yes	No	No	No	135	72	151	44.8	19.6483	normal	42.9	18.815	normal	0.833297	B	7.4	4.8	7.7	3	5.7	6.7	6.3	5.1	Yes	61.7	No	Yes	147	75	No	64.8	No	No	8.4	4.75	3.8	3.5	7.5	8	4.9	0	2257
110	M	62	No	No	Yes	No	Yes	No	Yes	Yes	170	90	174	69.8	23.0546	normal	62.4	20.6104	normal	2.44418	D	12.5	3.7	11	3.3	6.1	6.8	7.9	5.3	Yes	50.9	No	Yes	178	93	No	48.9	No	No	11.2	9.58	4.5	3.2	7.1	7.9	5.8	0	2257
111	M	64	No	No	Yes	No	No	Yes	No	No	182	91	158	70.4	28.2006	high	67	26.8386	high	1.36196	C	10.62	4.4	8.6	3	6.5	7.5	5.3	3.2	Yes	52.9	No	Yes	194	95	No	49.6	No	No	9.6	9.68	3.6	3.4	8	8.6	7	0	100
112	M	50	No	No	Yes	No	No	No	Yes	No	134	83	165	55.9	20.5326	normal	51.9	19.0634	normal	1.46924	C	10.04	5.1	9	2.5	5.6	7.1	10.8	4	Yes	57.8	No	Yes	169	106	No	50.9	No	No	10.6	5.48	4	3	7.6	8.6	5.3	0	2185
113	M	51	No	No	Yes	No	No	Yes	Yes	Yes	186	91	160	65.4	25.5469	high	58.4	22.8125	normal	2.73438	D	8.17	6.3	13.2	1.7	7.6	9.9	8.1	4.3	Yes	41.1	No	Yes	157	81	No	38.6	No	No	13.2	6.34	4	1.8	7.6	9.8	5.2	0	677
114	M	56	No	No	Yes	No	Yes	Yes	Yes	Yes	140	72	179	68.4	21.3476	normal	61.3	19.1317	normal	2.21591	D	5.61	9.3	9.7	2.3	6.9	8.6	4	4.9	Yes	61.9	No	Yes	157	81	No	61.2	No	No	8.4	5.47	3.9	2	6.7	8.7	3.9	0	2222
115	M	72	Yes	No	Yes	No	No	No	Yes	Yes	157	74	160	77.3	30.1953	high	71.4	27.8906	high	2.30469	D	10.33	4.4	7.9	3.1	6.9	7.8	6.8	5	Yes	53.3	No	Yes	157	79	No	53.3	No	No	8.7	8.38	4	3.1	7.4	8.3	5.3	0	2012
116	F	70	Yes	No	No	No	Yes	No	No	Yes	187	73	159	51.9	20.5293	normal	49.9	19.7381	normal	0.791108	B	10.21	3.3	8.5	3.6	8.7	9.1	7.8	5.3	Yes	53.8	No	Yes	179	71	No	53.8	No	No	8.7	6.2	3.6	3.4	8.8	9.4	5	1	1097
117	M	71	Yes	No	Yes	No	No	Yes	Yes	Yes	172	91	160	56.9	22.2266	normal	56.9	22.2266	normal	0	A	11.25	4	8.6	3	7.2	8.2	6	4.7	No	50.2	No	No	161	95	No	50.2	No	No	9.5	9.13	3.8	3	7.7	8.7	4.5	0	2161
118	M	69	Yes	No	Yes	No	No	No	Yes	No	171	91	165	62.2	22.8466	normal	55.3	20.3122	normal	2.53444	D	9.4	5	8.8	3.5	8.5	9	8.8	4.8	Yes	71	Yes	Yes	121	78	No	53.2	No	No	11.4	8.06	5.7	3.2	8.6	9.4	5.8	1	517
119	M	72	Yes	No	Yes	Yes	Yes	No	Yes	No	91	59	151	54.8	24.034	high	56.3	24.6919	high	-0.657866	A	16.3	2.7	12.3	2.5	8.2	9.7	7.3	4.3	No	51.5	Yes	Yes	121	72	No	67	No	No	8.6	9.13	3.5	2	7.2	9.2	7.2	0	395
120	M	70	Yes	No	Yes	No	Yes	No	Yes	Yes	177	94	160	70.3	27.4609	high	64.4	25.1562	high	2.30469	D	9.12	5.1	10.5	3.2	6.7	7.5	8.4	4.3	Yes	56.8	Yes	Yes	138	69	No	47.8	No	No	10.9	8.08	4	3.1	8.2	9.1	6	0	1946
121	M	83	Yes	No	Yes	No	No	No	Yes	Yes	146	65	150	55	24.4444	high	48.5	21.5556	normal	2.88889	D	10.45	4.2	10.1	2.6	8	9.4	5.4	3.8	No	53.4	No	No	115	56	Yes	49	No	Yes	10.1	6.01	3.4	2.7	8.2	9.5	3.4	0	1777
122	M	73	Yes	No	Yes	Yes	Yes	Yes	Yes	Yes	160	77	170	53.6	18.5467	normal	47.9	16.5744	low	1.97232	C	6.74	7	6.2	2.1	8	9.9	4	4.3	Yes	54.4	No	Yes	171	72	No	50.3	No	No	8.9	5.69	3.4	2.5	7.7	9.2	3.1	0	1968
123	F	74	Yes	No	Yes	No	No	No	No	Yes	175	94	150	41.1	18.2667	low	39.2	17.4222	low	0.844444	B	7.63	4.5	10.7	3.2	6.7	7.5	7.3	4.5	Yes	56.4	No	Yes	124	75	No	55.3	No	No	9.7	5.32	3.8	2.7	8.1	9.4	3	1	1794
124	M	83	Yes	No	Yes	No	No	Yes	No	Yes	134	101	160	60.9	23.7891	normal	52.1	20.3516	normal	3.4375	D	7.25	6.2	10.5	3.2	8	8.8	4.7	3.4	Yes	63	No	Yes	103	85	No	57.7	No	No	9.8	7.28	3.7	2.8	8.1	9.3	4.5	1	227
125	F	65	Yes	No	No	No	Yes	No	No	Yes	200	109	137	56.4	30.0495	high	56	29.8364	high	0.213117	A	6.99	5.2	10.4	2.8	8.1	9.3	3.8	3.7	No	69.6	No	No	163	89	No	65.9	No	No	9.9	7.13	4.1	3.1	8.6	9.5	4.1	0	2074
126	M	67	Yes	No	Yes	No	Yes	Yes	Yes	No	163	83	170	49.8	17.2318	low	50.1	17.3356	low	-0.103806	A	11.25	4.1	7.6	2.9	8.9	10	3.9	3.7	Yes	44.5	No	Yes	124	69	No	41.9	No	No	6.9	7.96	3.5	3.1	8.1	9	4.2	0	92
127	M	70	Yes	No	Yes	No	Yes	No	Yes	No	200	88	168	64.4	22.8175	normal	60.7	21.5065	normal	1.31094	C	10.7	4.3	9.5	3.4	8.9	9.5	7.3	5.5	Yes	51.6	No	Yes	174	74	No	45.1	No	No	8.7	9.73	4.1	3.4	8.6	9.2	5.2	0	679
128	F	87	Yes	No	Yes	No	No	No	No	Yes	105	54	136	34.8	18.8149	normal	33.6	18.1661	low	0.648789	B	7.05	4.7	11	2.9	8.9	10	5.4	4.5	No	46.3	No	No	122	62	No	61.9	No	No	10.8	5.47	3.4	2.9	8.9	10	3.5	1	804
129	F	75	Yes	No	Yes	No	Yes	No	No	Yes	180	76	155	47.1	19.6046	normal	44.1	18.3559	low	1.2487	C	10.33	3.2	11.1	3.2	8.6	9.4	6.5	4	Yes	51.3	No	Yes	166	75	No	47.3	No	No	11.3	8.71	3.9	3	9.3	10.3	4.7	0	2132
130	M	76	Yes	No	Yes	No	No	No	Yes	No	130	85	156	51.8	21.2853	normal	52.8	21.6963	normal	-0.410914	A	8.51	5.4	13.6	4.2	9.8	9.8	6.9	5.7	No	47.6	No	No	108	63	No	50.9	No	No	11.4	5.25	3.8	3.8	8.6	8.8	3.4	0	1992
131	M	69	Yes	No	Yes	No	Yes	Yes	Yes	Yes	117	56	161	61.5	23.7259	normal	57.6	22.2214	normal	1.50457	C	8.82	5.3	9.2	2.5	7.6	9.1	3.5	3.7	No	62.9	No	No	135	62	No	62.9	No	No	9.2	8.82	3.7	2.5	7.6	9.1	3.5	1	678
132	M	40	No	No	Yes	No	Yes	Yes	Yes	No	157	95	169	67.9	23.7737	normal	64.3	22.5132	normal	1.26046	C	8.87	6.2	11.2	2.5	6.6	8.1	6.2	4	Yes	56.9	No	Yes	143	81	No	47.1	No	No	11.5	7.99	4	2.8	7.9	9.1	5.6	0	2113
133	M	62	No	No	Yes	No	Yes	No	Yes	Yes	146	81	165	68.9	25.3076	high	68.1	25.0138	high	0.293848	A	12.24	3.8	9.4	3.3	7.8	8.5	7.8	4.3	No	50.3	No	No	141	75	No	46.5	No	No	10	10.24	4.6	3.4	8.6	9.2	4.3	0	2077
134	M	44	No	No	Yes	No	No	No	No	Yes	112	66	173	95.8	32.0091	high	92.7	30.9733	high	1.03578	C	13.77	3.7	10.2	3.8	7.6	7.8	5.9	3.4	No	52.2	No	No	120	80	No	52.2	No	No	11.2	11.83	3.4	3.8	8.4	8.6	6	0	2042
135	F	82	Yes	No	Yes	No	No	No	No	Yes	169	86	140	44.1	22.5	normal	43.8	22.3469	normal	0.153061	A	8.8	3.7	10.9	3.5	8.4	8.9	4.4	4.2	No	61.4	No	No	138	73	No	61.4	No	No	10.9	8.8	4.2	3.5	8.4	8.9	4.4	1	2019
136	F	86	Yes	Yes	No	Yes	No	No	Yes	Yes	149	68	146	31	14.5431	low	30.7	14.4023	low	0.140739	A	7.73	4.3	8.6	3.5	8.6	9.1	5.1	4	No	57.2	No	No	146	61	No	58.2	No	No	7.7	5.37	3.7	3.6	9.5	9.9	4.4	1	1799
137	F	53	No	No	Yes	No	No	No	No	Yes	179	84	157	70.4	28.561	high	69.6	28.2364	high	0.324557	A	9.45	3.9	10.6	3.7	8.9	9.2	3.6	4.7	No	40	No	No	190	102	No	45.8	No	No	11.1	8.64	4.1	3.8	9.6	9.8	3	0	1992
138	M	66	Yes	No	Yes	No	Yes	Yes	Yes	No	174	78	158	74.8	29.9631	high	73.1	29.2822	high	0.680981	B	8.55	5.6	10.1	4	7.7	7.7	5.8	4.8	No	55.3	No	No	129	70	No	51.1	No	No	9.5	7.84	3.9	3.6	8.2	8.6	3.8	0	2029
139	M	72	Yes	No	Yes	No	Yes	No	Yes	Yes	195	91	171	62.9	21.5109	normal	55.5	18.9802	normal	2.53069	D	11.92	3.8	10	2	7.7	9.7	4.8	5.3	Yes	49.4	No	Yes	193	88	Yes	48.4	No	Yes	10.3	7.74	3.6	1.9	7.8	9.9	3.1	0	1971
140	M	78	Yes	No	Yes	No	Yes	Yes	No	No	158	87	157	62.3	25.2749	high	61.4	24.9097	high	0.365126	B	8.87	5.1	9.2	4	9.5	9.5	4.7	4	No	47.2	No	No	167	82	No	47.1	No	No	8.7	9.59	4.3	3.9	9.6	9.7	5.2	1	1528
141	M	63	No	No	Yes	No	No	No	Yes	Yes	140	88	160	50.9	19.8828	normal	50.7	19.8047	normal	0.078125	A	15.61	2.9	11.5	3.6	8.9	9.3	5.3	3.8	No	41.5	No	No	138	87	No	41.5	No	No	11	8.83	3.7	3.3	8.8	9.5	3	0	1667
142	F	69	Yes	No	Yes	No	Yes	No	No	Yes	167	83	145	51.3	24.3995	high	50.9	24.2093	high	0.19025	A	9.65	3.6	11.3	3.5	8	8.5	8.8	4.3	Yes	56.5	No	Yes	112	63	No	55.1	No	No	13.3	6.07	3.9	3.2	8.5	9.3	5.4	0	1096
143	M	78	Yes	No	Yes	No	No	No	No	Yes	138	82	154	40	16.8663	low	39.5	16.6554	low	0.210828	A	6	7.8	9.2	3.7	8.8	9.1	4.1	5.1	No	43.8	No	No	141	79	No	43.8	No	No	9.4	5.83	3.7	3.7	9	9.3	4	1	1138
144	M	77	Yes	No	Yes	No	No	Yes	Yes	Yes	146	60	155	58.8	24.4745	high	54.3	22.6015	normal	1.87305	C	8.04	5.7	8	2.6	7.1	8.5	5.1	3.7	Yes	51.3	No	Yes	131	56	No	54.3	No	No	8.7	6.03	3.5	2.7	8	9.3	3.8	0	1903
145	M	49	No	No	Yes	No	Yes	No	Yes	Yes	172	97	170	90.7	31.3841	high	83.9	29.0311	high	2.35294	D	12.83	3.9	11.1	4.2	7.2	7.2	6.2	4.7	Yes	53.3	No	Yes	153	87	No	44.9	No	No	12.4	16.34	4.7	4.1	8.4	8.4	8.5	0	1938
146	F	42	No	No	Yes	No	Yes	No	Yes	Yes	166	89	160	75.4	29.4531	high	73.8	28.8281	high	0.625	B	10.33	3.8	9.2	3.7	9.5	9.8	4	4.5	No	46.8	No	No	148	84	No	46.8	No	No	9.2	10.33	4.5	3.7	9.5	9.8	4	0	1260
147	M	63	No	Yes	Yes	Yes	Yes	No	Yes	No	197	87	165	79	29.0174	high	69.2	25.4178	high	3.59963	D	8.23	5.9	7.9	1.3	7.4	10.1	8	6.4	Yes	52.7	No	Yes	208	90	Yes	48.4	No	Yes	7.6	5.19	3.3	1.2	7.4	10.2	3.6	0	433
148	M	81	Yes	No	Yes	No	No	Yes	Yes	Yes	127	67	165	57.7	21.1938	normal	54.8	20.1286	normal	1.0652	C	9.58	4.6	8.9	2.9	8.3	9.4	8.5	4.2	Yes	47.4	No	Yes	114	64	No	47.4	No	No	9.6	7.28	3.9	3.4	8.7	9.3	5	1	1212
149	M	73	Yes	No	Yes	Yes	Yes	No	Yes	Yes	166	81	159	54.9	21.7159	normal	50.4	19.9359	normal	1.77999	C	10.19	4.5	7.8	2.8	7.9	9.1	7.8	5.2	Yes	60	Yes	Yes	214	100	No	48.9	No	No	9.3	6.63	3.9	3.2	8.4	9.2	3.6	1	232
150	M	51	No	Yes	Yes	Yes	Yes	Yes	Yes	Yes	177	98	175	84.9	27.7224	high	71.9	23.4776	normal	4.2449	D	12.32	4	8.3	1.7	6.7	9	9	5.6	Yes	50.3	No	Yes	170	92	Yes	43.7	No	Yes	8	7.31	4.1	1.9	7.4	9.5	5	0	1698
151	M	84	Yes	No	Yes	Yes	No	Yes	Yes	No	114	76	170	53.1	18.3737	low	52.4	18.1315	low	0.242215	A	4.93	9.5	10.2	3.2	8.5	9.3	5.2	3.1	Yes	55.4	No	Yes	168	51	No	52.2	No	No	9.7	4.78	3	3	7.9	8.9	4.1	0	836
152	M	66	Yes	No	Yes	No	Yes	No	Yes	No	194	96	166	84.8	30.7737	high	74.8	27.1447	high	3.62897	D	12.03	3.8	8.9	2.8	5.9	7.1	5.5	3.6	Yes	55.1	No	Yes	157	88	Yes	48.6	No	Yes	9.7	13.61	4	3.4	6.7	7.3	7.6	0	1922
153	M	81	Yes	No	Yes	No	No	No	Yes	No	143	61	153	46	19.6506	normal	46	19.6506	normal	0	A	10.72	4.1	10.5	3.5	8.3	8.8	4.6	4.3	No	47.9	No	No	127	47	No	47.1	No	No	10.9	7.62	4	3.2	8.1	8.9	4.8	0	1917
154	F	53	No	No	Yes	No	Yes	No	No	Yes	184	94	169	88.5	30.9863	high	83.4	29.2007	high	1.78565	C	13.1	3.7	9.1	3.8	8.5	8.7	7	4.5	Yes	55.2	No	Yes	146	78	No	55.2	No	No	9.1	17.08	3.2	3.8	8.7	8.9	5.2	0	1462
155	F	60	No	No	Yes	Yes	Yes	No	Yes	No	160	70	151	62.4	27.3672	high	62.2	27.2795	high	0.0877155	A	12.66	2.8	9.3	2.7	8.3	9.6	7.7	4	Yes	53.3	No	Yes	141	65	No	57.9	No	No	7.6	4.76	4	2.7	8	9.3	2.2	0	1903
156	F	74	Yes	No	No	Yes	Yes	Yes	No	No	100	52	151	40.1	17.5869	low	39.4	17.2799	low	0.307004	A	9.15	3.7	9.4	3.2	8.7	9.5	8.8	4.7	Yes	56.5	No	Yes	104	54	No	53.8	No	No	7.9	5.13	3.9	3.1	8.5	9.4	4.2	1	458
157	M	63	No	Yes	Yes	Yes	Yes	No	No	No	181	90	162	58.6	22.3289	normal	53.9	20.538	normal	1.79089	C	19.42	2.3	6.8	3	5.8	6.8	12.4	5.3	Yes	54.2	No	Yes	156	90	Yes	58.5	No	Yes	7	8.9	4.9	2.5	7.2	8.7	5.7	0	1810
158	M	86	Yes	No	Yes	Yes	No	No	Yes	Yes	176	92	157	59.4	24.0983	high	52.3	21.2179	normal	2.88044	D	10.21	4.3	9.3	3.5	8.5	9	5.5	5.5	Yes	56.6	No	Yes	141	80	Yes	54.3	No	Yes	8.9	8.78	4.7	3.1	7.9	8.8	5.3	1	1056
159	M	44	No	No	Yes	No	Yes	No	Yes	No	166	96	164	83.9	31.1942	high	77.1	28.666	high	2.52826	D	11.82	4.4	8.3	2.4	7.2	8.8	6.3	4.8	Yes	49	No	Yes	171	117	No	44.3	No	No	10	10.26	4.1	2.7	8.7	10	4	0	1650
160	M	50	No	No	Yes	Yes	Yes	No	Yes	Yes	194	119	172	83.5	28.2247	high	73.3	24.7769	high	3.44781	D	11.36	4.4	9.4	2	7.3	9.3	7.3	5.1	Yes	54.6	No	Yes	163	97	Yes	57.5	No	Yes	10	8.4	4.5	2.1	7.9	9.8	4.9	0	526
161	M	70	Yes	No	Yes	Yes	Yes	Yes	Yes	No	155	79	182	87.9	26.5367	high	74.7	22.5516	normal	3.98503	D	8.39	5.6	8.7	3.4	7.7	8.3	5.6	3.6	Yes	62.3	Yes	Yes	152	78	No	44.8	No	No	10	7.04	4.2	3.5	8.7	9.2	2.9	0	1869
162	F	61	No	No	No	No	Yes	Yes	No	No	153	74	146	41	19.2344	normal	40.1	18.8122	normal	0.422218	B	7.47	4.9	9.9	4.1	9.9	9.9	4.5	4.2	Yes	59.4	No	Yes	149	70	No	53.4	No	No	10.3	5.94	3.9	3.8	9.2	9.4	5	1	1119
163	M	73	Yes	No	Yes	No	Yes	Yes	Yes	No	152	76	170	72.4	25.0519	high	66.6	23.045	normal	2.00692	C	8.6	5.4	10	2.5	7.7	9.2	6.9	4.6	Yes	56.5	Yes	Yes	152	67	No	48.8	No	No	9.2	5.95	3.7	2.2	7.7	9.5	4.1	1	873
164	F	84	Yes	Yes	Yes	Yes	Yes	No	No	Yes	176	81	147	43.5	20.1305	normal	37.9	17.539	low	2.59151	D	7.15	4.7	7.7	2.8	8	9.2	6	4.6	Yes	65.8	Yes	Yes	169	79	No	63.5	No	No	9.4	5.53	3.5	2.8	7.9	9.1	4.9	0	1736
165	M	67	Yes	Yes	Yes	Yes	Yes	Yes	Yes	No	151	63	163	60.3	22.6956	normal	64.6	24.3141	high	-1.61843	A	7.36	6.5	11.4	3.1	8.8	9.7	5.8	3.8	No	42.6	No	No	117	53	No	41.9	No	No	7.6	6.3	3.6	2.4	8	9.6	3.5	0	1519
166	F	75	Yes	No	Yes	Yes	Yes	No	No	No	169	78	151	63.5	27.8497	high	57	24.9989	high	2.85075	D	9.51	3.5	8.2	2.7	7.7	9	7.4	5.2	Yes	60.2	No	Yes	135	67	No	55.6	No	No	9.1	9	4.5	2.9	8.5	9.6	5.5	0	1808
167	F	79	Yes	No	Yes	No	Yes	No	No	Yes	134	47	148	57	26.0226	high	56.5	25.7944	high	0.228269	A	7.68	4.4	12	4	9.2	9.2	5.1	4.7	No	45.2	No	No	135	64	No	48.8	No	No	10.9	7.93	4	3.5	8.7	9.2	5.4	0	1833
168	M	66	Yes	No	Yes	No	Yes	Yes	Yes	Yes	146	62	172	72.7	24.5741	high	68.3	23.0868	normal	1.48729	C	9.88	4.8	10.3	2.7	6.7	8	8.8	5.9	Yes	53.7	Yes	Yes	123	74	No	51.5	No	No	8.8	7.89	4.4	2.6	7.5	8.9	5.4	1	1159
169	M	66	Yes	No	Yes	No	Yes	Yes	Yes	No	163	75	156	53.3	21.9017	normal	49.5	20.3402	normal	1.56147	C	9.44	5	10	3.5	8.3	8.8	4.2	4.1	No	50.5	No	No	139	77	No	41.6	No	No	11.4	9.26	4.4	3.4	8.1	8.7	6	0	1819
170	M	77	Yes	No	Yes	No	Yes	No	Yes	No	181	85	162	63.7	24.2722	high	60.5	23.0529	normal	1.21933	C	8.75	5.2	12.5	3.8	9	9.2	4.6	3.5	No	44.1	No	No	146	79	No	42.7	No	No	12.5	8.42	3.6	3.5	8.6	9.1	4.8	0	1817
171	M	66	Yes	No	Yes	Yes	No	Yes	Yes	Yes	177	94	170	65.6	22.699	normal	62.9	21.7647	normal	0.934256	B	10.24	4.6	8.9	3.3	8.7	9.4	5.3	5	No	60.3	No	No	146	92	No	54	No	No	9.4	10.49	3.6	3	8.5	9.5	4.4	0	1816
172	F	56	No	No	Yes	No	Yes	No	No	Yes	190	92	152	40.3	17.4429	low	38.8	16.7936	low	0.649238	B	10.92	3.3	8.7	3.1	8.4	9.3	6.6	3.5	Yes	50.2	No	Yes	182	85	No	51.1	No	No	8.7	5.56	3.7	3	8.4	9.4	4.1	0	1816
173	M	87	Yes	No	Yes	No	No	Yes	Yes	Yes	120	61	157	45.8	18.5809	normal	44	17.8506	low	0.730253	B	8.83	5	9	3.5	8	8.5	7.2	4.9	No	56.9	No	No	103	62	No	56.9	No	No	8.7	6.58	4.1	3.3	7.5	8.2	5.3	1	1101
174	F	76	Yes	No	Yes	No	Yes	No	No	Yes	159	72	140	45.3	23.1122	normal	43.4	22.1429	normal	0.969388	C	5.45	6.5	11.3	2.7	8.8	10.1	5	4.3	Yes	55	No	Yes	118	54	No	53.9	No	No	10.6	5.13	3.5	2.1	7.9	9.8	3.7	1	1543
175	M	79	Yes	No	Yes	No	No	Yes	Yes	Yes	111	60	168	46.4	16.4399	low	47.2	16.7234	low	-0.283447	A	10.35	4.3	12.2	2.8	8.8	10	8.3	5	No	52.7	No	No	111	59	No	48.2	No	No	9.8	6.63	4	2.2	8.4	10.2	4	1	574
176	M	46	No	No	Yes	Yes	No	No	Yes	Yes	162	83	160	55.2	21.5625	normal	54.9	21.4453	normal	0.117188	A	14.76	3.4	9.2	3.7	8.3	8.6	9.1	4.7	No	65.8	No	No	167	85	No	65.8	No	No	10.7	9.35	4.7	4.1	8.9	8.9	9.4	0	286
177	M	54	No	No	Yes	No	Yes	No	Yes	No	143	94	172	73.6	24.8783	high	73.1	24.7093	high	0.16901	A	13.11	3.7	10.3	3.9	8.8	8.9	6	5.5	No	48.5	No	No	146	91	No	48.5	No	No	10.4	12.41	4.3	3.7	8	8.3	3.4	0	302
178	M	83	Yes	Yes	Yes	Yes	No	No	Yes	No	193	98	168	72.1	25.5456	high	61.3	21.7191	normal	3.82653	D	10.21	4.3	6	2.6	6.6	8	6.5	5.5	Yes	59	Yes	Yes	148	84	No	60.4	No	No	9.1	6.74	3.7	2.3	7.1	8.8	4.3	0	523
179	M	66	Yes	No	Yes	No	No	No	Yes	No	124	62	165	58	21.3039	normal	56.9	20.8999	normal	0.40404	B	9.91	4.7	7.8	4.7	9.4	9.4	8	4.3	No	55.2	No	No	136	71	No	55.2	No	No	7.4	8.32	4.8	3.7	8.6	8.9	4.8	0	108
180	M	71	Yes	Yes	Yes	No	No	No	Yes	Yes	136	76	169	59.9	20.9727	normal	57.8	20.2374	normal	0.735268	B	7.05	6.7	9.5	2.9	8.2	9.3	5	5.4	No	53.4	Yes	Yes	132	75	No	42.8	No	No	10.1	5.85	4.1	3.3	8.3	9	4	0	910
181	M	61	No	Yes	Yes	Yes	Yes	No	No	Yes	135	57	169	64.2	22.4782	normal	63.7	22.3031	normal	0.175064	A	13.45	3.5	5.5	3.1	7.6	8.5	8.8	5.2	No	48.5	No	No	111	60	No	48.5	No	No	9.8	8.17	4.5	2.9	7.9	9	4.9	0	843
182	M	65	Yes	No	Yes	No	Yes	No	Yes	Yes	157	94	161	68.2	26.3107	high	66.9	25.8092	high	0.501524	B	11.91	3.9	8.7	3.7	8.8	9.1	6.4	5.3	No	47	No	No	114	74	No	47	No	No	10.4	11.99	5	4	9	9	6.3	0	883
183	M	57	No	No	Yes	No	Yes	Yes	Yes	Yes	172	86	164	50.3	18.7017	normal	47.5	17.6606	low	1.04105	C	8.12	6.1	10.8	3.1	7.3	8.2	6.7	5.4	No	51.7	No	No	140	77	No	51.7	No	No	11.7	6.61	4.1	3.2	8.2	9	3.7	0	1684
184	M	82	Yes	No	Yes	Yes	Yes	Yes	No	Yes	183	87	158	58.8	23.5539	normal	52.4	20.9902	normal	2.56369	D	10.51	4.2	8.1	3.3	8.1	8.8	6.1	4.1	Yes	53.1	No	Yes	165	85	No	47.1	No	No	8.9	9.66	3.7	3.5	8.8	9.3	6.9	1	804
185	M	85	Yes	No	Yes	No	Yes	No	Yes	No	124	63	159	44.1	17.4439	low	43.9	17.3648	low	0.0791108	A	9.1	4.8	7	2.9	8.2	9.3	9.3	5.7	Yes	57	No	Yes	104	61	No	58.8	No	No	9.5	7.12	4.2	3	8.9	9.9	4	1	193
186	M	73	Yes	No	Yes	No	Yes	Yes	Yes	Yes	139	65	168	59.4	21.0459	normal	56.4	19.983	normal	1.06293	C	9.77	4.7	9.3	2.8	7.4	8.6	6.4	3.2	Yes	45.1	No	Yes	180	75	No	44.6	No	No	9.7	6.96	3.5	2.7	7.5	8.8	4.8	0	1590
187	M	63	No	Yes	Yes	Yes	No	No	Yes	No	123	80	155	51.9	21.6025	normal	52.2	21.7274	normal	-0.12487	A	21.24	2.1	4.9	3.6	5.4	5.8	9	4.7	No	47.5	No	No	95	46	No	43.3	No	No	9.2	9.03	4	2.8	8.5	9.7	3.4	0	1615
188	F	57	No	No	Yes	No	No	Yes	No	No	131	81	149	50.5	22.7467	normal	49.9	22.4765	normal	0.270258	A	10.23	3.5	9.1	3.3	6.7	7.4	6.6	4.7	No	52.4	No	No	120	57	No	50.2	No	No	7.4	6.81	3.9	2.4	8.1	9.7	3.5	1	1214
189	M	73	Yes	No	Yes	No	No	No	Yes	Yes	166	87	178	69.4	21.9038	normal	68.9	21.746	normal	0.157808	A	8.08	5.8	10.8	3.7	9.6	9.9	4.1	4.5	No	44.1	No	No	118	66	No	44.1	No	No	10.2	8.19	4.1	3.5	9.5	10	4.1	0	1355
190	F	39	No	No	Yes	No	Yes	Yes	No	No	181	94	153	60.3	25.7593	high	52.3	22.3418	normal	3.41749	D	10.52	3.8	10.4	3.7	8.8	9.1	5.9	4.7	Yes	64.6	No	Yes	148	86	No	47.9	No	No	11.3	9.96	3.9	3.7	9.2	9.5	4.7	0	830
191	F	65	Yes	No	Yes	No	No	No	No	Yes	137	75	146	53.9	25.2862	high	49.9	23.4096	normal	1.87652	C	17.49	1.9	8.7	2.9	6.9	8	10.9	4	Yes	56.4	No	Yes	134	71	No	56.4	No	No	10.4	14.16	4.3	3.1	8.2	9.1	4.8	0	1415
192	M	70	Yes	No	Yes	Yes	No	Yes	Yes	No	147	75	165	46.9	17.2268	low	45.5	16.7126	low	0.514233	B	8.33	5.6	7.9	3.5	7.2	7.7	8.5	3.8	Yes	54.2	Yes	Yes	137	72	No	45.2	No	No	8	4.95	4.2	2.7	7.5	8.8	4.8	1	263
193	M	77	Yes	No	Yes	No	No	No	Yes	No	172	88	156	62	25.4767	high	60.8	24.9836	high	0.493097	B	9.08	5	9.6	3.5	8.9	9.4	3.3	4.9	No	47	No	No	133	79	No	46.2	No	No	10.1	6.73	4.2	3.4	8.8	9.4	2.9	0	1585
194	M	85	Yes	No	Yes	Yes	Yes	Yes	Yes	No	135	55	160	53.9	21.0547	normal	46.9	18.3203	low	2.73437	D	10.36	4.2	11.1	2.3	8	9.7	5.3	4.1	Yes	57.4	No	Yes	143	46	Yes	49.3	No	Yes	7.9	7.9	3.6	2.3	7.9	9.6	2.9	0	1366
195	M	50	No	No	Yes	No	No	No	Yes	Yes	145	76	167	68.4	24.5258	high	67.2	24.0955	high	0.430277	B	8.94	5.7	10.2	3.6	7.9	8.3	6.9	5.5	No	47.5	No	No	143	92	No	47.5	No	No	11.6	7.88	4.9	3.7	8.8	9.1	5.3	0	1305
196	M	72	Yes	No	Yes	No	Yes	Yes	Yes	Yes	157	110	163	59.8	22.5074	normal	59.2	22.2816	normal	0.225827	A	9.36	4.9	11.6	3.3	8.5	9.2	5.8	5.2	No	40.6	No	No	192	109	No	40.6	No	No	10.7	6.99	4.9	3.1	8	8.9	4.2	0	1524
197	M	70	Yes	No	Yes	No	Yes	Yes	Yes	Yes	209	85	175	56.1	18.3184	low	48.5	15.8367	low	2.48163	D	11.7	3.9	10.9	3.3	7	7.7	8.6	4.5	Yes	45.1	No	Yes	143	66	No	44.8	No	No	10.6	8.52	3.3	3.2	7.9	8.7	6.3	1	552
198	F	67	Yes	No	Yes	No	No	No	No	Yes	184	99	147	42.9	19.8528	normal	39.4	18.2331	low	1.6197	C	11.31	3	12.1	4.1	9.3	9.3	2.9	3.8	Yes	56.1	No	Yes	165	81	No	51.9	No	No	10.2	9.33	4.5	3.4	8.4	9	5.3	0	1127
199	F	70	Yes	No	Yes	Yes	No	Yes	Yes	Yes	139	65	145	48.1	22.8775	normal	45.2	21.4982	normal	1.37931	C	16.8	1.9	8.7	3	8.3	9.3	6.4	6.2	No	60.9	No	No	173	73	No	66.3	No	No	8.6	9.92	5	3.1	8.8	9.7	6	1	731
200	M	74	Yes	No	Yes	No	No	Yes	Yes	Yes	128	59	163	68.2	25.669	high	66.9	25.1797	high	0.489292	B	10.53	4.3	10.6	3.5	8.3	8.8	8.5	4.8	Yes	57.7	No	Yes	149	74	No	49	No	No	11.7	9.78	4.2	3.9	8.6	8.7	5.8	0	1503
201	M	74	Yes	No	Yes	No	Yes	No	Yes	No	192	118	154	55.3	23.3176	normal	48.5	20.4503	normal	2.86726	D	17.2	2.5	9	3.1	7.6	8.5	7.5	4.4	Yes	53.9	No	Yes	155	83	No	53.5	No	No	8.5	10.7	3.2	2.5	8.2	9.7	4.7	0	1221
202	M	41	No	No	Yes	No	Yes	No	Yes	Yes	155	94	165	118.5	43.5262	high	105.2	38.641	high	4.88522	D	27.17	1.8	8.2	3.1	7.9	8.8	12.2	6.4	Yes	62	Yes	Yes	175	110	No	65.6	No	No	9.2	22.58	5.8	3.2	8.5	9.3	11.2	0	1047
203	M	77	Yes	No	Yes	No	Yes	No	Yes	No	168	77	152	50	21.6413	normal	49.1	21.2517	normal	0.389543	B	10.44	4.3	11.5	3.6	9.4	9.8	5.8	4.7	No	50.2	No	No	162	67	No	50.1	No	No	9.7	6.91	3.8	3.5	9.3	9.8	2.9	0	1494
204	F	68	Yes	No	Yes	No	Yes	No	No	Yes	173	82	146	68.9	32.3231	high	57.1	26.7874	high	5.53575	D	10.32	3.3	10.8	3.2	10	10.8	4.8	3.9	Yes	72.7	Yes	Yes	192	85	Yes	65.9	No	Yes	11.9	7.39	3.4	3.3	8.8	9.5	2.6	0	1464
205	M	64	No	No	Yes	Yes	Yes	Yes	Yes	No	153	73	161	56.9	21.9513	normal	56.1	21.6427	normal	0.30863	A	9.81	4.8	8.6	2.2	5.1	6.9	6.4	2.9	Yes	65.6	Yes	Yes	158	85	No	50.3	No	No	9.1	5.73	3.8	2.6	7.5	8.9	3.6	0	1481
206	M	61	No	Yes	Yes	No	Yes	No	Yes	Yes	163	73	160	61	23.8281	normal	59	23.0469	normal	0.78125	B	12.6	3.7	9.4	2.6	7.6	9	5.3	3.8	No	49.5	No	No	189	88	No	51.4	No	No	8.5	8.84	4.6	3.4	5.9	6.5	5.2	0	398
207	M	42	No	No	Yes	No	Yes	Yes	Yes	No	157	97	172	113.9	38.5005	high	107.1	36.202	high	2.29854	D	7.89	6.9	11.6	3.3	7.2	7.9	7.6	4.5	Yes	62.2	Yes	Yes	123	86	No	49.6	No	No	14.7	6.78	4.5	4.1	9.3	9.3	5	0	1091
208	F	74	Yes	No	Yes	No	No	Yes	No	No	95	56	156	46.7	19.1897	normal	44.7	18.3679	low	0.821828	B	5.61	6.3	6.8	2.4	7.4	9	7.8	5.5	Yes	61.9	Yes	Yes	83	51	Yes	56.7	Yes	Yes	9.4	5.24	4.1	2.4	7.7	9.3	4.5	0	1429
209	F	65	Yes	Yes	Yes	No	Yes	Yes	No	Yes	160	67	144	40.9	19.7242	normal	38	18.3256	low	1.39853	C	8.76	4	10.8	2.6	7.5	8.9	5.2	5.8	Yes	60	Yes	Yes	163	70	No	53.2	No	No	10.3	4.54	4.5	3.5	8.7	9.2	3.9	0	1453
210	F	62	No	Yes	No	Yes	No	No	No	No	179	94	151	55.4	24.2972	high	53.5	23.4639	normal	0.833297	B	9.33	3.8	7.3	2.4	7	8.6	5.7	4.4	Yes	49.2	No	Yes	161	87	Yes	46.5	No	Yes	8.8	7.17	3.5	2.9	8.2	9.3	3.9	0	1451
211	M	73	Yes	Yes	Yes	Yes	No	No	Yes	No	136	80	167	53.5	19.1832	normal	53.3	19.1115	normal	0.0717129	A	9	5.1	7.4	2	8.3	10.3	6.7	5.2	No	39.3	No	No	121	73	No	44.3	No	No	7.3	6.2	3.9	3.3	6	6.7	3.6	0	1432
212	M	81	Yes	No	Yes	No	Yes	No	Yes	Yes	148	79	166	62.6	22.7174	normal	61.2	22.2093	normal	0.508056	B	8.35	5.4	8.8	2.5	7.4	8.9	5.2	5.3	Yes	50.6	No	Yes	207	97	Yes	51.6	No	Yes	9.4	7.2	4.2	2.6	7.7	9.1	4.2	0	1413
213	F	78	Yes	No	Yes	No	No	No	No	No	142	71	145	47	22.3543	normal	47	22.3543	normal	0	A	8.27	4.1	10.9	3.7	9.2	9.5	5	4.2	No	56.1	No	No	131	70	No	56.1	No	No	10.7	7.07	4	3.3	8.7	9.4	4.8	0	1014
214	M	71	Yes	No	Yes	Yes	Yes	No	Yes	Yes	147	74	164	62.8	23.3492	normal	57.8	21.4902	normal	1.85901	C	7.9	5.9	8.5	2.1	6.3	8.2	6	3.9	Yes	64.8	Yes	Yes	114	59	No	61.9	No	No	7.8	6.16	3.5	2.2	7	8.8	3.9	0	1413
215	M	77	Yes	No	Yes	No	Yes	No	Yes	Yes	205	98	160	50.3	19.6484	normal	45.1	17.6172	low	2.03125	C	10.09	4.4	9.7	2.4	7.1	8.7	5.8	4.9	Yes	51.7	No	Yes	149	71	No	47.2	No	No	10.5	7.3	4.4	2.5	8.3	9.8	5.5	0	285
216	F	74	Yes	No	Yes	No	No	No	No	No	152	80	156	41.9	17.2173	low	41	16.8475	low	0.369822	B	6.37	5.5	8.4	3.5	8.4	8.9	5.7	4.1	Yes	64.6	No	Yes	155	78	No	63	No	No	8.3	3.63	3.6	3.1	8.1	9	3.6	1	770
217	F	73	Yes	No	Yes	No	No	No	No	No	142	82	155.6	52.9	21.8492	normal	52	21.4775	normal	0.371726	B	8.04	4.3	11.4	4.2	9.2	9.2	6.6	4.2	Yes	48.6	No	Yes	121	78	No	48.6	No	No	10.4	6.56	4.5	3.5	8.5	9	5.9	0	1393
218	M	83	Yes	No	Yes	Yes	Yes	Yes	Yes	Yes	121	57	161.5	60.6	23.2342	normal	60.7	23.2725	normal	-0.0383403	A	9.4	4.7	10.7	2.6	8.6	10	5.7	4.5	No	54.5	Yes	Yes	120	70	No	58.1	No	No	9.2	8.25	4.2	2.8	7.6	8.8	5	0	1329
219	F	56	No	No	Yes	No	Yes	No	Yes	Yes	177	75	151	66.3	29.0777	high	60.5	26.5339	high	2.54375	D	6.87	5.5	12	3	7.8	8.8	4.7	4.2	Yes	65.6	No	Yes	147	70	No	62.8	No	No	12.5	6.52	3.9	3.4	8.3	8.9	4.2	0	1286
220	M	65	Yes	No	Yes	No	Yes	No	Yes	No	201	108	162.2	67.3	25.5808	high	64.4	24.4785	high	1.10229	C	13.88	3.3	8.9	3.5	8.9	9.4	6.7	4.5	Yes	60.1	No	Yes	157	81	Yes	57.1	No	Yes	10.1	10.59	5.1	3.6	8.2	8.6	6.8	0	1189
221	M	67	Yes	No	Yes	No	Yes	No	Yes	No	163	70	169	64.2	22.4782	normal	61.2	21.4278	normal	1.05038	C	8.5	5.6	10.9	3.8	8.7	8.9	5.4	3.9	No	57.3	No	No	164	84	No	51	No	No	11.9	6.42	3.4	3.6	8.4	8.8	4	0	1294
222	F	75	Yes	No	No	Yes	No	No	No	No	197	85	143	43.7	21.3702	normal	37.9	18.5339	normal	2.83632	D	7.41	4.6	9.3	2.2	7.3	9.1	11.3	5	Yes	64.9	No	Yes	135	65	No	61.6	No	No	8.5	4.7	3.6	1.9	7.1	9.2	4.1	0	180
223	M	86	Yes	No	No	No	No	No	Yes	No	140	62	156	41.9	17.2173	low	41.4	17.0118	low	0.205457	A	6.13	7.4	9.2	3	7.7	8.7	4	3.8	No	51.9	No	No	198	82	No	51.9	No	No	9.1	5.52	4.1	2.8	7.9	9.1	4	0	1146
224	M	43	No	No	Yes	Yes	Yes	Yes	Yes	No	176	87	171	98	33.5146	high	91.4	31.2575	high	2.2571	D	9.59	5.6	9.2	3	6.9	7.9	6	4	Yes	47.4	No	Yes	153	86	No	40	No	No	9.9	14.32	4.5	3.7	9	9.3	6.8	0	1285
225	M	76	Yes	No	Yes	No	No	No	Yes	No	136	57	154	49.9	21.0406	normal	48	20.2395	normal	0.801147	B	5.84	8.1	11.8	3	7.9	8.9	5.3	3.1	Yes	57.4	Yes	Yes	145	89	No	56	No	No	10.5	5.7	3	2.6	7.8	9.2	3.6	1	476
226	M	52	No	No	Yes	No	Yes	Yes	Yes	No	148	87	172.4	68.8	23.148	normal	65.4	22.0041	normal	1.14394	C	7.87	6.5	11.9	3.5	8.1	8.6	6	4.9	No	42.7	No	No	156	98	No	41.2	No	No	12.3	5.97	3.7	3.2	8.3	9.1	4.2	0	1273
227	M	54	No	No	Yes	No	Yes	No	Yes	No	171	91	171.1	89.8	30.6744	high	85.3	29.1373	high	1.53714	C	8.17	6.2	10.4	2.6	8.2	9.6	5.7	2.9	Yes	50	No	Yes	197	115	No	51.3	No	No	11.1	6.59	3.8	2.9	8.2	9.3	3.8	1	455
228	F	81	Yes	No	Yes	Yes	No	No	No	No	163	76	143	44.9	21.9571	normal	38.9	19.0229	normal	2.93413	D	12.33	2.6	9.4	3.7	6.1	6.4	8.1	4.1	Yes	67.9	Yes	Yes	150	67	No	65	No	No	11	8.69	4.7	3.7	8.6	8.9	4.5	0	1272
229	M	68	Yes	No	Yes	No	Yes	No	Yes	No	161	79	166.5	68.4	24.6733	high	64	23.0861	normal	1.58717	C	9.89	4.7	9.4	4	8.4	8.4	7.1	5.3	Yes	49.2	No	Yes	159	67	No	49.4	No	No	9.4	9.68	4.6	3.9	9	9.1	4.4	0	935
230	F	58	No	No	Yes	No	Yes	No	Yes	No	197	109	170	82.2	28.4429	high	76.9	26.609	high	1.83391	C	9.04	4	9.7	2.9	8.1	9.2	8.7	3.6	Yes	61	No	Yes	194	97	No	46	No	No	9.7	6.6	3.8	2.9	8.5	9.6	4.3	0	1203
231	M	75	Yes	Yes	Yes	Yes	Yes	No	Yes	Yes	181	83	161.2	69.1	26.5918	high	67.3	25.8991	high	0.692696	B	11.74	3.8	9	3.6	8.7	9.1	4.9	4	No	46	No	No	169	78	No	45.2	No	No	8.7	9.43	3.8	3.4	8	8.6	4.3	0	812
232	M	67	Yes	No	Yes	No	Yes	Yes	Yes	No	138	66	167.4	62.8	22.4104	normal	56.9	20.3049	normal	2.10543	D	7.22	6.7	9.1	3.5	8.7	9.2	6.3	5	Yes	62.2	Yes	Yes	207	94	No	58	No	No	9.4	5.05	4	3.5	8.5	9	4.4	0	229
233	F	74	Yes	No	No	No	Yes	Yes	No	No	176	73	150.4	45.9	20.2916	normal	40.9	18.0812	low	2.21042	D	8.42	4.1	9.8	2.3	7.8	9.5	4.9	4.2	Yes	65.2	No	Yes	186	74	Yes	57.6	No	Yes	10	6.83	4.1	2.7	7.9	9.2	5.3	0	1165
234	M	82	Yes	No	Yes	No	No	Yes	Yes	No	127	82	159	63	24.9199	high	59	23.3377	normal	1.58222	C	7.24	6.3	9.9	2.7	6.1	7.4	6.9	4.2	Yes	62.2	Yes	Yes	145	75	No	49.6	No	No	10.4	6.51	4.4	3.3	7.9	8.6	5.5	1	986
235	F	71	Yes	No	No	Yes	Yes	Yes	Yes	No	123	51	149	65.9	29.6833	high	63.1	28.4221	high	1.2612	C	4.03	9.2	7.3	3.5	7.7	8.2	7.8	2.5	No	55.8	No	No	117	53	No	60.5	No	No	7.5	4.66	4.7	3.2	8.3	9.1	4.3	1	622
236	F	78	Yes	No	Yes	No	Yes	No	No	Yes	160	84	148.7	47.8	21.6175	normal	42.9	19.4015	normal	2.21602	D	8.94	3.7	10.6	2.8	8.1	9.3	5.2	3.9	Yes	52.4	No	Yes	148	74	No	51.5	No	No	10.9	7.33	3.6	2.6	7.3	8.7	4.8	0	700
237	F	73	Yes	No	Yes	No	No	No	Yes	Yes	131	68	155.2	47.9	19.8862	normal	45.8	19.0144	normal	0.871838	B	8.66	3.9	8.8	3.1	8.2	9.1	6.4	4.2	Yes	63.6	No	Yes	117	66	No	63.6	No	No	9.6	6.23	3.9	3	8.5	9.5	4.4	1	702
238	M	62	No	No	Yes	No	Yes	No	No	No	169	83	171	76.8	26.2645	high	69.6	23.8022	normal	2.4623	D	10.83	4.4	8.9	2.9	6.4	7.5	3.6	3.5	Yes	51.8	No	Yes	155	79	No	45	No	No	9.8	8.68	3.8	3.3	7	7.7	4.4	0	1133
239	M	55	No	No	Yes	No	No	No	Yes	No	144	107	160.3	63.8	24.8287	high	62.4	24.2839	high	0.54483	B	10.79	4.6	8.4	3.6	7.1	7.5	5.2	3.8	Yes	47	No	Yes	139	87	No	47	No	No	8.4	10.79	3.8	3.6	7.1	7.5	5.2	0	1085
240	M	82	Yes	No	Yes	No	No	No	No	No	157	80	163.1	49.4	18.5703	normal	48.2	18.1192	low	0.451101	B	8.13	5.5	7.5	2.9	8.1	9.2	5.6	4.3	No	52.9	No	No	161	87	No	55.7	No	No	8.6	5.78	4.1	2.6	7.8	9.2	4.3	0	1130
241	F	68	Yes	No	No	No	No	Yes	No	Yes	147	76	147.7	43.7	20.0318	normal	43.3	19.8485	normal	0.183358	A	6.89	5.2	9	4.1	8.8	8.8	4	4.1	No	48.5	No	No	170	89	No	48.5	No	No	9.7	6.59	4.1	3.7	8.6	8.9	5.2	0	1079
242	F	68	Yes	No	Yes	Yes	No	Yes	No	Yes	111	64	151.1	43.7	19.1405	normal	43.8	19.1843	normal	-0.0437997	A	7.5	4.7	7.2	2.3	7.5	9.2	4.9	3.5	No	59.7	Yes	Yes	107	66	No	59.5	No	No	8.3	6.73	4.5	2.5	8.3	9.8	5	0	1125
243	F	44	No	Yes	Yes	Yes	No	No	No	No	146	88	151.9	62.4	27.0439	high	60.4	26.1771	high	0.866791	B	17.86	2.1	7.8	2.6	7.1	8.5	9.9	4.1	No	65.2	No	No	116	74	No	62.5	No	No	8.3	8.09	3.8	3	7.7	8.7	2.8	0	1110
244	M	74	Yes	No	Yes	No	No	Yes	No	No	129	63	167.9	69.9	24.7957	high	67.3	23.8734	normal	0.922299	B	8.42	5.5	10	2.6	7.6	9	6.6	3.4	Yes	48.1	No	Yes	188	80	No	47.2	No	No	10.4	6.55	3.4	2.9	8.1	9.2	4.1	0	1051
245	M	45	No	Yes	Yes	No	Yes	No	Yes	No	179	106	170.3	83.3	28.7221	high	73.5	25.343	high	3.37907	D	7.76	6.9	8.2	2.4	7.9	9.5	7.1	3.9	Yes	53	No	Yes	161	97	No	51.8	No	No	9.2	5.8	3.9	2.5	7.7	9.2	4.2	0	1037
246	M	43	No	Yes	Yes	Yes	No	No	No	No	218	133	167	84.3	30.227	high	82.7	29.6533	high	0.573703	B	13.93	3.7	10.2	3	7.7	8.7	6.1	2.8	Yes	65.4	Yes	Yes	137	83	No	54.7	No	No	10.2	15.83	5.2	3	7.6	8.6	10	0	322
247	M	64	No	No	Yes	No	Yes	No	No	No	223	117	160	61.3	23.9453	normal	55.9	21.8359	normal	2.10938	D	12.53	3.7	12.6	3.6	7.2	7.6	7.5	5	Yes	49.4	No	Yes	131	79	No	46.5	No	No	12.6	15.04	4.4	3.5	8.1	8.6	5.3	0	984
248	M	55	No	No	Yes	No	Yes	No	Yes	No	134	70	159.5	51.5	20.2435	normal	49.7	19.536	normal	0.70754	B	8.81	5.7	11.7	4	8.3	8.3	4.2	6.5	Yes	47.3	No	Yes	144	79	Yes	47.1	No	Yes	10.5	5.96	5.2	3.3	8.4	9.1	5.3	0	1054
249	M	43	No	No	Yes	No	No	No	No	No	166	104	170.2	63.4	21.8862	normal	61.6	21.2648	normal	0.621374	B	11.96	4.4	8.6	3.3	7.7	8.4	7.7	5.1	No	49.8	No	No	162	99	No	49.9	No	No	9.9	11.08	4.2	3.8	8.7	8.9	4.7	0	552
250	M	71	Yes	No	Yes	No	No	No	Yes	Yes	152	73	169.3	72.2	25.1897	high	70.3	24.5268	high	0.662887	B	8.88	5.2	8.4	3.6	8.2	8.6	7.4	4.6	No	59.3	No	No	145	66	No	59.3	No	No	9.1	8.65	3.9	4	8.6	8.6	4.8	0	1043
251	M	82	Yes	Yes	Yes	Yes	No	No	Yes	No	195	103	172	62.8	21.2277	normal	61.6	20.8221	normal	0.405625	B	12.04	3.6	7.8	3.8	6.2	6.4	6.8	4.9	No	48.8	No	No	114	61	No	45.5	No	No	9.3	7.37	3.5	3.3	7.3	8	4.1	0	1040
252	M	44	No	No	Yes	Yes	Yes	Yes	Yes	Yes	188	115	171.6	106.7	36.2351	high	92.8	31.5147	high	4.72042	D	6.65	8.2	11.2	1.5	7	9.5	6	4.2	Yes	47.9	No	Yes	173	104	Yes	43.4	No	Yes	11.5	5.88	4	1.7	7.2	9.5	4.6	0	1025
253	M	76	Yes	No	No	No	Yes	Yes	Yes	Yes	126	84	155.7	57.9	23.8837	normal	55	22.6874	normal	1.19625	C	7.59	6.1	9.5	2.8	8.2	9.4	6	4.7	Yes	55.9	No	Yes	103	64	No	54.2	No	No	10.7	6.23	4.3	3.2	8.5	9.3	5.4	0	1024
254	M	64	No	No	Yes	No	Yes	No	No	No	116	82	154.3	73.3	30.7873	high	62.9	26.4191	high	4.36819	D	7.11	6.9	10.8	3.4	7.8	8.4	6	4.6	Yes	60.9	No	Yes	122	70	No	56	No	No	10.6	7.08	4.5	3.8	9.4	9.6	4.9	0	1012
255	F	63	No	No	Yes	No	No	No	No	No	147	92	160.3	47.4	18.4464	low	47.5	18.4853	normal	-0.0389164	A	11.46	3	10.1	4.2	9.6	9.6	6.5	5	No	52.9	No	No	136	89	No	54.9	No	No	9	8.92	4.9	3.9	9.7	9.8	4.6	0	1005
256	M	55	No	No	Yes	No	No	No	No	Yes	165	96	160	55.1	21.5234	normal	54.7	21.3672	normal	0.15625	A	13.37	3.6	11.2	3.8	8.9	9.1	4.3	4.3	No	43.1	No	No	131	81	No	43.1	No	No	11.8	10.47	3.7	3.7	8.6	8.9	3.6	0	2117
257	M	64	No	No	No	Yes	No	No	No	No	162	105	162	87.8	33.4553	high	87	33.1504	high	0.304832	A	8.38	5.7	9.7	3.6	7.5	7.9	5.5	5.5	No	56	No	No	148	77	No	56	No	No	9.5	8.02	3.8	3.7	7.9	8.2	4.8	0	2658
258	M	48	No	No	Yes	No	No	No	Yes	No	135	90	171	76.4	26.1277	high	74.6	25.5121	high	0.615574	B	10.49	4.9	11.2	4.1	8.4	8.4	6	5.2	No	51	No	No	115	84	No	44.3	No	No	11.6	12.88	4.1	3.9	9.4	9.5	3.9	0	2208
259	F	83	Yes	No	No	Yes	Yes	Yes	No	No	89	63	149	45.5	20.4946	normal	36.5	16.4407	low	4.05387	D	10.06	3.2	8.1	2.1	5	6.9	6.2	3.7	Yes	61.4	Yes	Yes	171	78	No	65	No	No	8.9	5.97	4.6	2.5	7.2	8.7	5.2	1	733
260	M	62	No	No	Yes	No	Yes	Yes	Yes	Yes	156	95	153.4	51.3	21.8005	normal	47.7	20.2706	normal	1.52986	C	10.12	4.7	6.9	3.3	9.6	10.3	4.7	5	Yes	62.5	Yes	Yes	153	79	No	55	No	No	10.3	6.82	3.2	3.4	9.3	9.9	5.4	0	1520
261	M	79	Yes	Yes	No	Yes	No	No	Yes	Yes	158	70	153.6	56.5	23.9478	normal	46.7	19.794	normal	4.15378	D	6.29	7.4	9.5	2.1	7.2	9.1	7.2	3.7	Yes	59.7	No	Yes	131	66	No	52.1	No	No	8.7	7.64	4.1	1.8	7.4	9.6	7.6	1	76
262	M	85	Yes	Yes	Yes	No	Yes	No	Yes	No	127	72	153	52.2	22.2991	normal	47.3	20.2059	normal	2.09321	D	8.76	5	8.5	2.7	7.8	9.1	9.1	4.1	Yes	55.1	No	Yes	122	76	No	54.9	No	No	10.2	5.8	3.7	2.9	8.3	9.4	4.4	1	60
263	M	57	No	Yes	Yes	Yes	Yes	No	Yes	Yes	154	85	164	78.3	29.1121	high	73.6	27.3647	high	1.74747	C	15.09	3.1	9.1	2.3	7.7	9.4	7.5	4.1	Yes	52.5	Yes	Yes	143	89	Yes	52.1	No	Yes	8	15.04	4.2	2.7	7.7	9	5	1	56
264	F	81	Yes	Yes	No	Yes	Yes	Yes	No	No	123	54	136	43.5	23.5186	normal	42.6	23.032	normal	0.486592	B	5.04	6.9	8.6	2.5	7.5	9	9.2	4.3	Yes	65.2	Yes	Yes	94	47	Yes	61.7	No	Yes	9.9	3.85	3.8	2.4	7.3	8.9	6.6	1	39
265	M	54	No	Yes	No	Yes	Yes	No	Yes	Yes	107	57	180.2	74.9	23.066	normal	68.7	21.1567	normal	1.90933	C	5.36	9.8	10.2	1.7	7.3	9.6	10.2	3.3	Yes	51.4	Yes	Yes	136	90	Yes	50.7	No	Yes	10.5	4.25	4	1.9	6.9	9	7.9	1	24
266	M	88	Yes	Yes	Yes	No	No	Yes	Yes	No	146	74	161	54.1	20.8711	normal	50.4	19.4437	normal	1.42741	C	7.96	5.5	11.8	4	9	9	4.5	3.7	Yes	43.1	No	Yes	142	67	Yes	45.2	No	Yes	11.8	7.96	3.7	4	9	9	4.5	1	19
